# Supplementary material for: Strong neutralizing antibody responses to SARS-CoV-2 variants following a single vaccine dose in subjects with previous SARS-CoV-2 infection
Source: bioRxiv or medRxiv preprint supplement (doi:10.1101/2022.07.04.22277223), 2022-07-06

## Supplementary material

**Supplementary Table 1.** Details of the SARS-CoV-2 virus strains used in live-virus microneutralization test

| WHO label     | Pango lineage | Isolate                            | GISAID accession ID | GenBank accession ID |
|---------------|---------------|------------------------------------|---------------------|----------------------|
| Wild-type     | B             | hCoV-19/Finland/1/2020             | EPI_ISL_407079      | MZ934691             |
| Alpha         | B.1.1.7       | hCoV-19/Finland/THL-202102301/2021 | EPI_ISL_2590786     | MZ944886             |
| Beta          | B.1.351       | hCoV-19/Finland/THL-202101018/2021 | EPI_ISL_3471851     | MZ944846             |
| Delta         | B.1.617.2     | hCoV-19/Finland/THL-202117309/2021 | EPI_ISL_2557176     | MZ945494             |
| Omicron /BA.1 | B.1.1.529     | hCoV-19/Finland/THL-202126660/2021 | EPI_ISL_8768822     | OM393712             |

**Supplementary Figure 1.** Neutralizing potency of serum, calculated as the ratio of neutralizing activity (MNT titer) to the SARS-CoV-2 anti-spike antibody concentration (binding antibody unit (BAU)/ml) specific to the receptor binding domain, RBD-IgG (A) and full-length spike protein, SFL-IgG (B)) against WT SARS-CoV-2 in uninfected subjects after two doses of COVID-19 vaccine, Comirnaty (vaccine only, n=20) and in subjects with previous SARS-CoV-2 infection followed by one dose of COVID-19 vaccine, Comirnaty (hybrid immunity, n=29). Serum samples were collected 14 to 30 days and 22 to 85 days after last vaccination for vaccine only and hybrid immunity groups, respectively. Statistical significance was determined by Mann-Whitney test, P values are indicated.

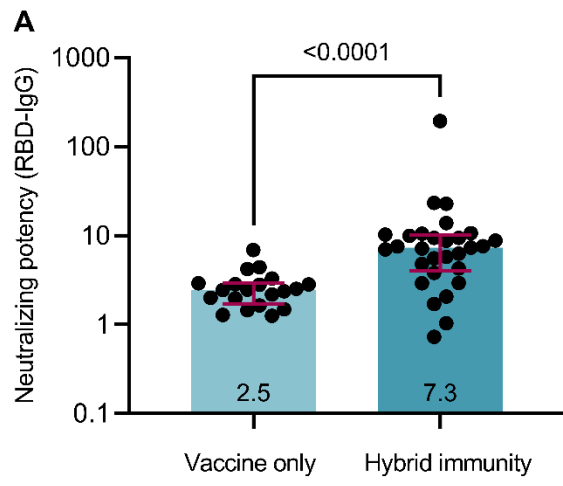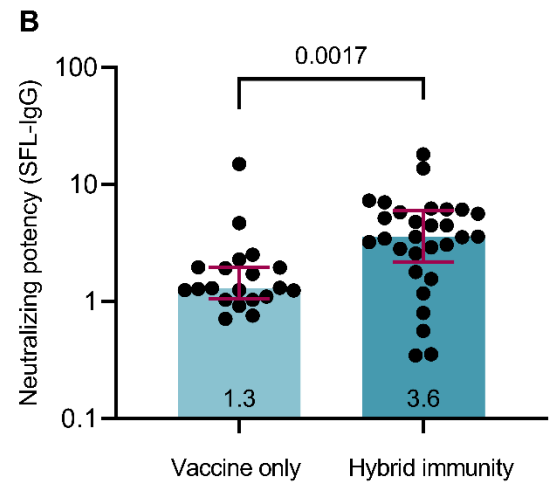

Supplement: Supplementary file [file media-1.pdf]
